# Supplementary material for: Causes Investigation of PM2.5 and O3 Complex Pollution in a Typical Coastal City in the Bohai Bay Region of China in Autumn: Based on One-Month Continuous Intensive Observation and Model Simulation
Source: MDPI journal article supplement (doi:10.3390/atmos15010073), 2024-01-07
Supplement: s1 [file s1]

## Supplementary Material:

# Causes investigation of PM<sub>2.5</sub> and O<sub>3</sub> complex pollution in a typical coastal city in the Bohai Bay region of China in autumn: Based on one-month continuous intensive observation and model simulation

Yuanyuan Ji <sup>1</sup>, Cong An <sup>1</sup>, Jinghao Tang <sup>2</sup>, Jialin Li <sup>3</sup>, Xiaoyu Yan <sup>1</sup>, Xiaoshuai Gao<sup>1</sup>, Wanghui Chu <sup>1</sup>, Xuelian Zhong <sup>2</sup>, Fanyi Shang <sup>4</sup>, Jidong Li <sup>4</sup>, Luyao Tan <sup>5</sup>, Rui Gao <sup>1</sup>, Fang Bi <sup>1</sup>, Hong Li <sup>1,\*</sup>

<sup>1</sup> State Key Laboratory of Environmental Criteria and Risk Assessment, Chinese Research Academy of Environmental Sciences, Beijing 100012, China

<sup>2</sup> Environment Research Institute, Shandong University, Qingdao 266000, China

<sup>3</sup> State Key Laboratory of Atmospheric Boundary Layer Physics and Atmospheric Chemistry, Institute of Atmospheric Physics, Chinese Academy of Sciences, Beijing 100029, China

<sup>4</sup> Dongying Municipal Ecology and Environment Bureau, Dongying 257000, China

<sup>5</sup> Ltd of Shandong Environmental Protection Industry Corp, Jinan 250000, China

## 1. Figures

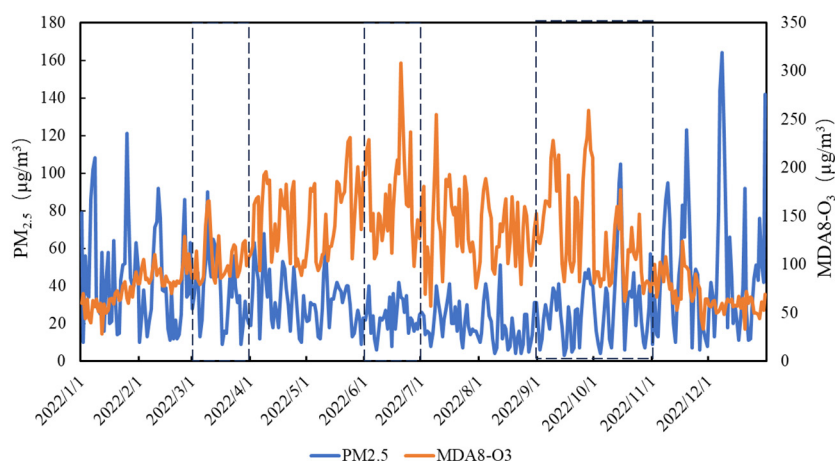

Figure S1. Daily variations of PM<sub>2.5</sub> and MDA8-O<sub>3</sub> in Dongying in 2022

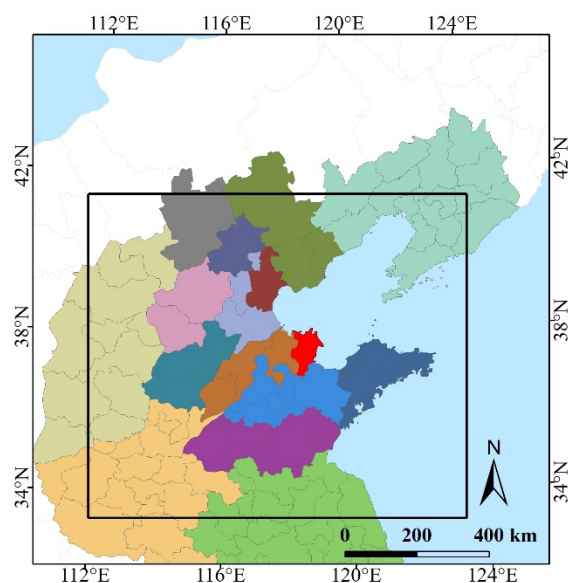

**Figure S2.** Simulated regions for source apportionment of O<sub>3</sub>.

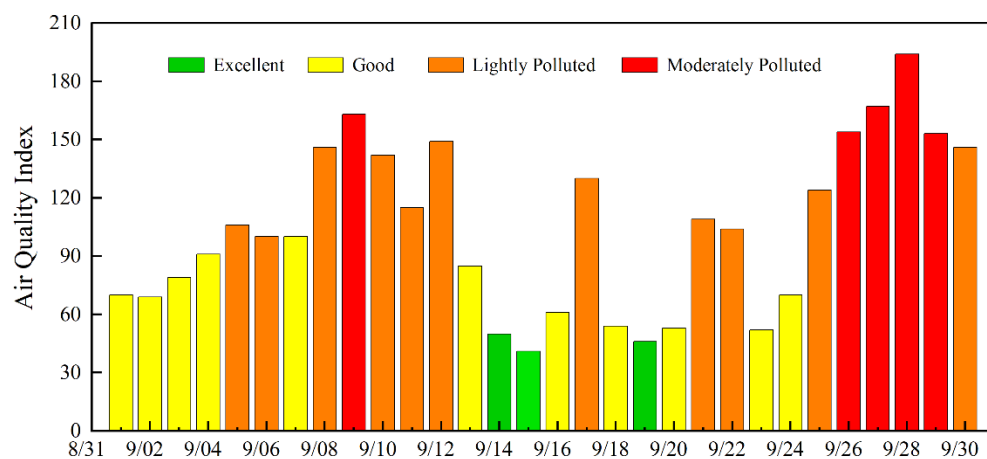

**Figure S3.** Daily variation of ambient air quality in Dongying City in September 2022.

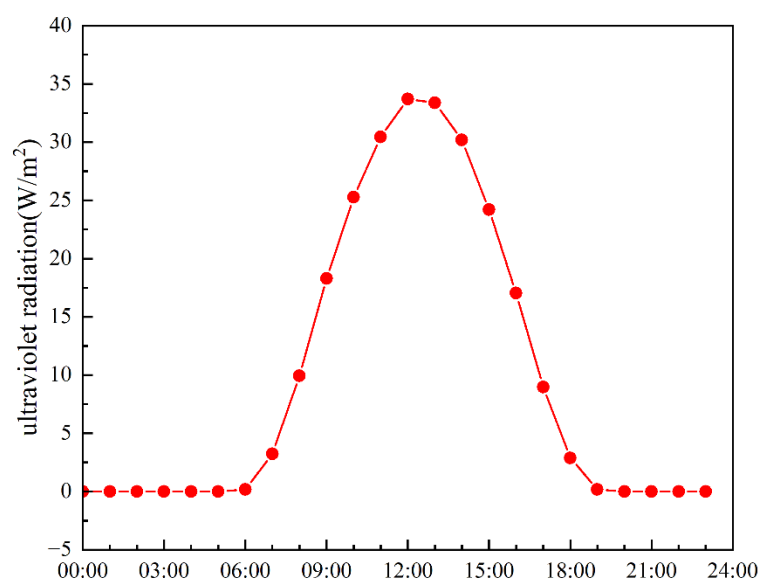

**Figure S4.** Diurnal variation of ultraviolet radiation in Dongying City in September 2022.

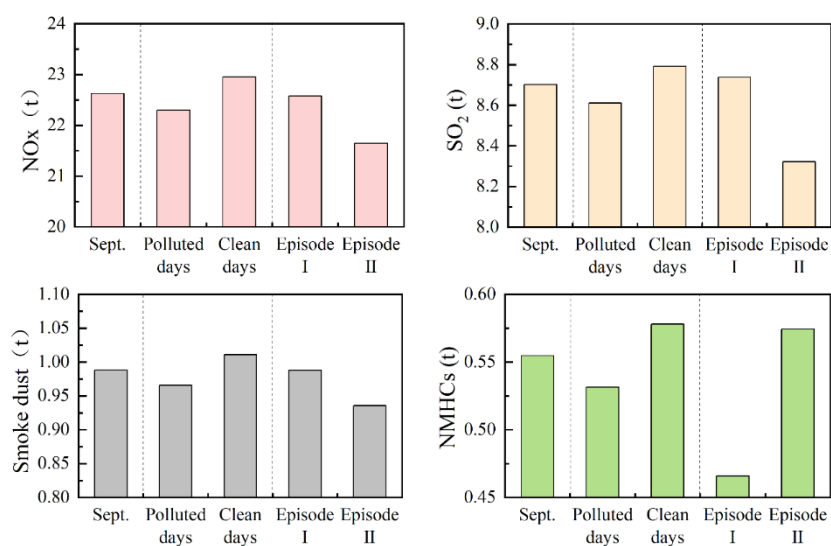

**Figure S5.** Comparison of pollution source emissions in Dongying in September 2022.

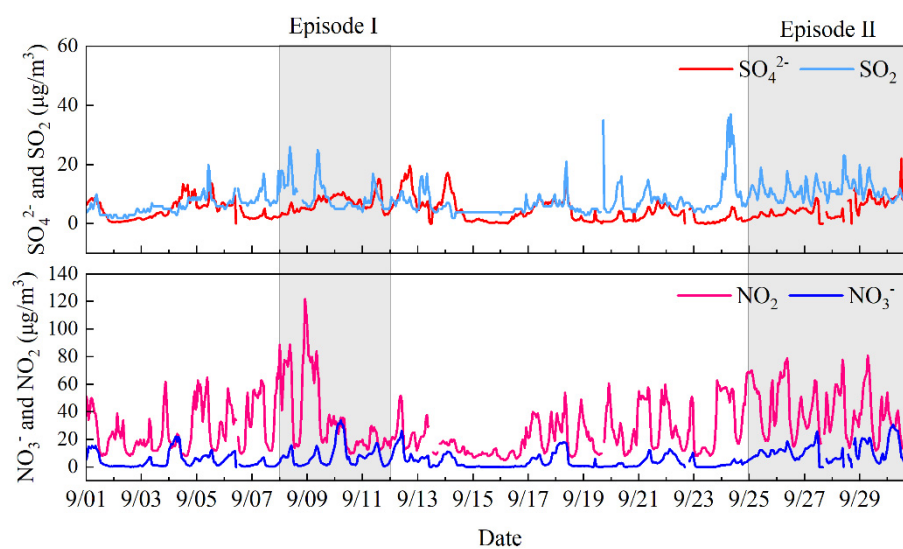

**Figure S6.** Time series of SO<sub>2</sub>, NO<sub>2</sub>, NO<sub>3</sub><sup>-</sup> and SO<sub>4</sub><sup>2-</sup> in Dongying in September 2022

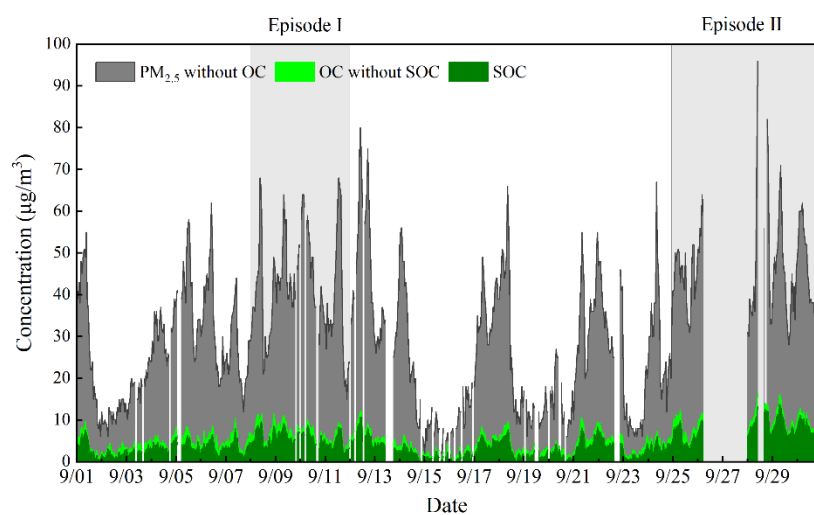

**Figure S7.** Time series diagram of SOC, OC and PM<sub>2.5</sub> concentrations in Dongying in September 2022.

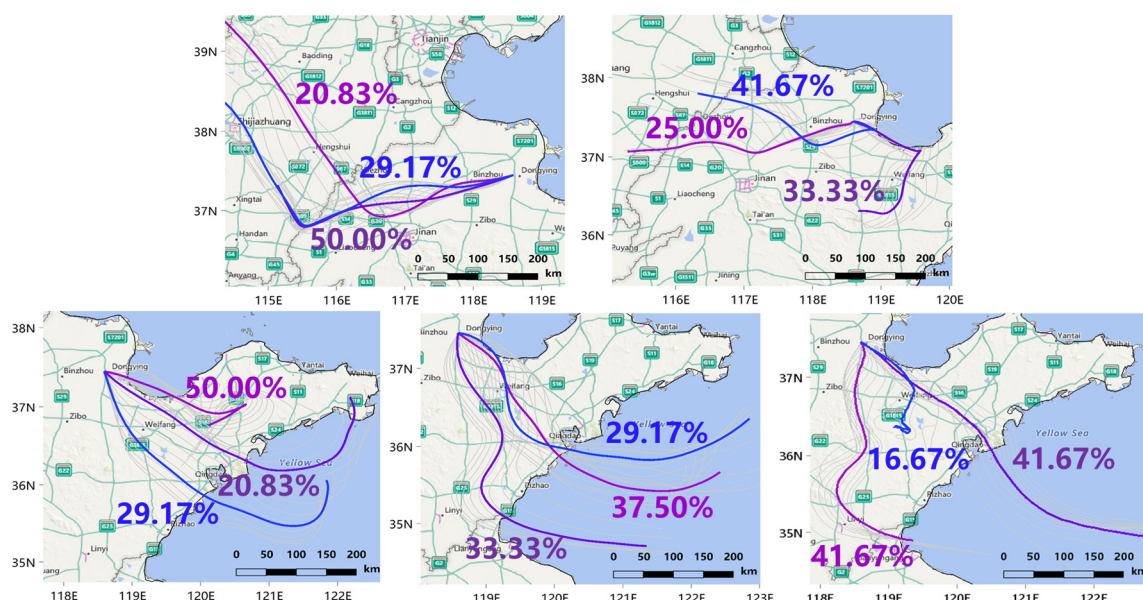

**Figure S8.** Results of backward trajectory cluster analysis during Sep. 8<sup>th</sup> to 12<sup>th</sup>.

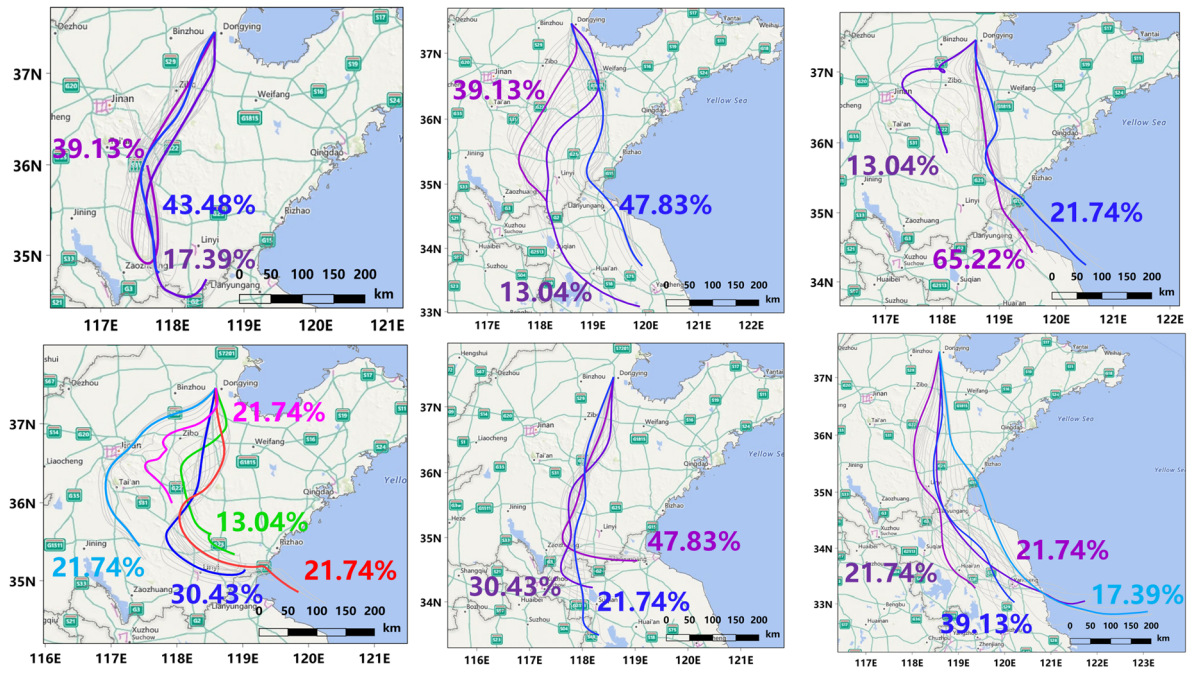

Figure S9. Results of backward trajectory cluster analysis during 25th to 30th, September.

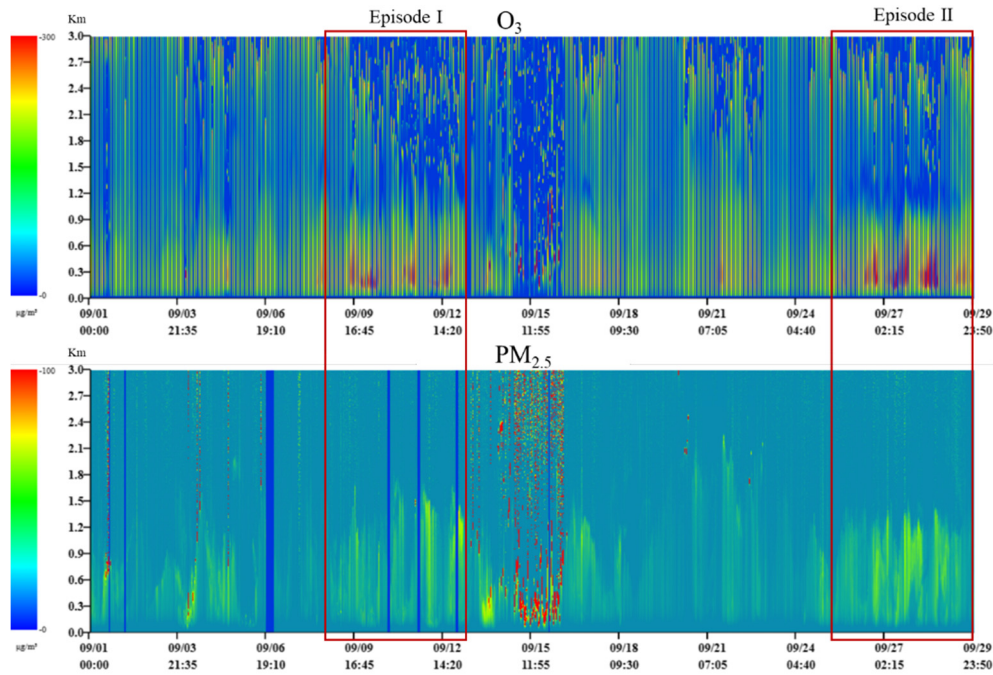

Figure S10. Vertical distribution characteristics of O<sub>3</sub> and PM<sub>2.5</sub> in Dongying in September 2022.

## 2. Definition and calculation of AQI

According to the requirements in the Technical Regulation on Ambient Air Quality Index (on trial) (HJ 633-2012), air quality index (AQI) is a dimensionless index that quantitatively describes air quality conditions. The following is the formula for calculate AQI.

$$AQI = \max \{IAQI_1, IAQI_2, IAQI_3, \dots, IAQI_n\}$$

Where, IAQI is an air quality sub-index, i.e., an air quality index for a single pollutant, and  $n$  is a pollutant. The IAQI and the corresponding pollutant concentration limits are as follows.

**Table S1.** Air quality sub-index (IAQI) and the corresponding pollutant concentration limits.

| IAQI | Pollutant concentration limits                                |                                                              |                                                               |                                                              |                                                                |                                                  |                                                 |                                                             |                                                                       |                                                                 |
|------|---------------------------------------------------------------|--------------------------------------------------------------|---------------------------------------------------------------|--------------------------------------------------------------|----------------------------------------------------------------|--------------------------------------------------|-------------------------------------------------|-------------------------------------------------------------|-----------------------------------------------------------------------|-----------------------------------------------------------------|
|      | SO <sub>2</sub><br>24-hour<br>average<br>(µg/m <sup>3</sup> ) | SO <sub>2</sub><br>1-hour<br>average<br>(µg/m <sup>3</sup> ) | NO <sub>2</sub><br>24-hour<br>average<br>(µg/m <sup>3</sup> ) | NO <sub>2</sub><br>1-hour<br>average<br>(µg/m <sup>3</sup> ) | PM <sub>10</sub><br>24-hour<br>average<br>(µg/m <sup>3</sup> ) | CO<br>24-hour<br>average<br>(mg/m <sup>3</sup> ) | CO<br>1-hour<br>average<br>(mg/m <sup>3</sup> ) | O <sub>3</sub><br>1-hour<br>average<br>(µg/m <sup>3</sup> ) | O <sub>3</sub><br>8-hour<br>moving<br>average<br>(µg/m <sup>3</sup> ) | PM <sub>2.5</sub><br>24-hour<br>average<br>(µg/m <sup>3</sup> ) |
| 0    | 0                                                             | 0                                                            | 0                                                             | 0                                                            | 0                                                              | 0                                                | 0                                               | 0                                                           | 0                                                                     | 0                                                               |
| 50   | 50                                                            | 150                                                          | 40                                                            | 100                                                          | 50                                                             | 2                                                | 5                                               | 160                                                         | 100                                                                   | 35                                                              |
| 100  | 150                                                           | 500                                                          | 80                                                            | 200                                                          | 150                                                            | 4                                                | 10                                              | 200                                                         | 160                                                                   | 75                                                              |
| 150  | 475                                                           | 650                                                          | 180                                                           | 700                                                          | 250                                                            | 14                                               | 35                                              | 300                                                         | 215                                                                   | 115                                                             |
| 200  | 800                                                           | 800                                                          | 280                                                           | 1200                                                         | 350                                                            | 24                                               | 60                                              | 400                                                         | 265                                                                   | 150                                                             |
| 300  | 1600                                                          | (1)                                                          | 565                                                           | 2340                                                         | 420                                                            | 36                                               | 90                                              | 800                                                         | 800                                                                   | 250                                                             |
| 400  | 2100                                                          | (1)                                                          | 750                                                           | 3090                                                         | 500                                                            | 48                                               | 120                                             | 1000                                                        | (2)                                                                   | 350                                                             |
| 500  | 2620                                                          | (1)                                                          | 940                                                           | 3840                                                         | 600                                                            | 60                                               | 150                                             | 1200                                                        | (2)                                                                   | 500                                                             |

Note: SO<sub>2</sub> and O<sub>3</sub> 1-hour average concentrations greater than 800 µg/m<sup>3</sup> are not subject to IAQI calculations.

The IAQI for pollutant P is calculated using the following equation.

$$IAQI_P = \frac{IAQI_{Hi} - IAQI_{Lo}}{BP_{Hi} - BP_{Lo}} (C_P - BP_{Lo}) + IAQI_{Lo}$$

Where, IAQI<sub>P</sub> is the IAQI of pollutant P, C<sub>P</sub> is the mass concentration of pollutant P, BP<sub>Hi</sub> and BP<sub>Lo</sub> are higher and lower values of pollutant concentration limits in Table 1 that are similar to C<sub>P</sub> respectively, IAQI<sub>Hi</sub> and IAQI<sub>Lo</sub> are IAQI in Table 1 corresponding to BP<sub>Hi</sub> and BP<sub>Lo</sub> respectively.
