# Supplementary material for: Causes Investigation of PM2.5 and O3 Complex Pollution in a Typical Coastal City in the Bohai Bay Region of China in Autumn: Based on One-Month Continuous Intensive Observation and Model Simulation
Source: MDPI journal article supplement (doi:10.3390/atmos15010073), 2024-01-07
Supplement: s1 [file s1]

Archive with 1 entries (1 files):
- atmosphere-2774192-supplementary.pdf
